# Supplementary material for: Acute psycho-physiological responses to submaximal constant-load cycling under intermittent hypoxia-hyperoxia vs. hypoxia-normoxia in young males
Source: PeerJ. 2024 Oct 4;12:e18027. doi: 10.7717/peerj.18027 (PMC11457877; doi:10.7717/peerj.18027)
Supplement: Supplemental Information 3 — Peripheral oxygen saturation (SpO2), percentage changes in oxygenated hemoglobin (%SmO2) and tissue hemoglobin (%tHb), and heart rate (HR) were measured prior to (BSL) and/or after every 4 min period during the 40-min cycling trial (i.e., at 4 [P4], 8 [P8], 12 [P12], 16 [P16], 20 [P20], 24 [P24], 28 [P28], 32 [P32], 36 [P36], and 40 min [P40]). Peripheral blood lactate concentration (BLC) was determined prior to (BSL) as well as immediately (post 0) and 10 min (post 10) after the 40-min cycling trial. Perceived motor fatigue, effort perception, perceived physical strain, affective valence, arousal, motivation to exercise, and conflict to continue exercise were queried after 4 (T4), 8 (T8), 20 (T20), 24 (T24), 36 (T36), and 40 min (T40) of submaximal constant-load cycling in each condition. Furthermore, perceived motor fatigue, affective valence, and arousal were also queried prior to (T0) and 10 min after (post 10) the 40-min cycling trial, whereas motivation to exercise was additionally assessed only at T0. Participants were asked to complete a revised 16-item version of the physical activity enjoyment scale (PACES) shortly after the end of cycling BMI, body mass index; IHHT, intermittent hypoxic-hyperoxic training; IHT, intermittent hypoxic-normoxic training; NOR, continuous normoxic training; POMS, profile of mood state; VO2peak, peak oxygen consumption; [file peerj-12-18027-s003.xlsx]

## Sheet: Data set
Participant	Age [y]	Height [cm]	Weight [kg]	BMI [kg/m*2]	VO2peak [L/min]	relative VO2peak [ml/min/kg]	Ambient temperature IHHT [°C]	Ambient temperature IHT [°C]	Ambient temperature NOR [°C]	POMS_IHHT	POMS_IHT	POMS_NOR	BLC_IHHT_BSL [mmol/l]	BLC_IHHT_post 0 [mmol/l]	BLC_IHHT_post 10 [mmol/l]	BLC_IHR_BSL [mmol/l]	BLC_IHT_post 0 [mmol/l]	BLC_IHT_post 10 [mmol/l]	BLC_NOR_BSL [mmol/l]	BLC_NOR_post 0 [mmol/l]	BLC_NOR_post 10 [mmol/l]	SpO2_IHHT_BSL [%]	SpO2_IHHT_P4 [%]	SpO2_IHHT_P8 [%]	SpO2_IHHT_P12 [%]	SpO2_IHHT_P16 [%]	SpO2_IHHT_P20 [%]	SpO2_IHHT_P24 [%]	SpO2_IHHT_P28 [%]	SpO2_IHHT_P32 [%]	SpO2_IHHT_P36 [%]	SpO2_IHHT_P40 [%]	SpO2_IHT_BSL [%]	SpO2_IHT_P4 [%]	SpO2_IHT_P8 [%]	SpO2_IHT_P12 [%]	SpO2_IHT_P16 [%]	SpO2_IHT_P20 [%]	SpO2_IHT_P24 [%]	SpO2_IHT_P28 [%]	SpO2_IHT_P32 [%]	SpO2_IHT_P36 [%]	SpO2_IHT_P40 [%]	SpO2_NOR_BSL [%]	SpO2_NOR_P4 [%]	SpO2_NOR_P8 [%]	SpO2_NOR_P12 [%]	SpO2_NOR_P16 [%]	SpO2_NOR_P20 [%]
IHE01	21	179	79	24.6559	3.91	49.52	21.5	22.9	23	66	82	73	0.3	1.19	0.61	0.3	0.74	0.3	1.15	0.51	0.3	97	79	99	81	98	80	98	87	98	85	98	98	82	94	87	94	73	94	88	94	89	95	97	95	95	95	95	96
IHE02	20	196	101	26.2911	5.04	49.86	23.5	21.7	22.6	68	59	66	0.62	1.05	0.74	0.3	1.72	0.86	0.3	0.75	0.3	98	76	97	81	98	81	98	80	97	80	97	96	75	95	77	92	76	93	79	93	79	91	97	93	95	95	93	92
IHE03	23	174	81.5	26.919	4.37	53.6	22.9	24.1	23.7	65	67	63	0.3	0.3	0.3	0.3	1.06	0.62	0.3	0.3	0.3	96	78	97	80	96	80	96	87	97	82	96	96	74	94	75	93	78	91	82	92	81	94	97	95	94	95	94	94
IHE04	22	172	68	22.9854	3.79	55.73	25.5	24.9	23.6	56	55	59	0.3	1.21	0.57	0.3	1.42	0.88	0.3	0.87	0.3	94	80	97	80	95	81	94	80	95	84	96	96	75	93	82	93	77	90	81	93	80	90	97	94	94	93	93	93
IHE05	21	170	72	25	3.61	50.5	25.5	25.7	24.5	75	56	65	0.3	1.09	0.76	0.3	1.47	0.85	0.3	0.8	0.3	97	84	98	81	97	80	97	81	98	82	98	96	82	95	84	94	81	92	83	94	87	92	98	96	95	95	95	95
IHE06	29	178	75	23.6713	4.25	56.66	23.9	25	24.7	60	54	65	0.52	1.12	0.71	0.3	1.34	0.76	0.3	0.9	0.3	95	82	98	82	97	82	97	86	97	81	96	96	81	94	80	92	79	94	80	92	79	92	95	96	93	95	94	95
IHE07	27	182	94	28.3782	4.8	51.12	26.1	25.2	25.9	47	67	48	0.3	1.57	1	0.3	1.48	2.22	0.3	1.12	0.61	97	79	97	75	98	77	98	79	98	83	98	97	75	94	77	93	75	93	78	92	78	94	96	95	94	94	94	95
IHE08	25	188	85	24.0493	3.92	46.1	24.2	24.1	23.8	65	65	65	0.61	0.56	0.3	0.81	0.85	0.3	0.3	0.5	0.3	96	88	98	87	98	85	97	85	97	83	98	97	82	95	82	94	80	95	84	93	81	94	97	96	95	95	96	95
IHE09	31	174	76	25.1024	3.52	46.37	24.2	24.7	23.2	59	67	54	0.3	1.01	0.56	0.62	1.11	0.56	0.3	0.52	0.3	97	83	98	84	98	87	97	84	97	85	98	97	84	95	84	95	85	95	85	95	87	94	97	96	96	96	95	94
IHE10	34	190	78.5	21.7452	3.65	46.51	24.4	23.2	24.4	48	50	47	0.3	0.3	0.3	0.3	0.6	0.3	0.3	0.3	0.3	94	77	97	80	94	80	95	80	94	80	95	95	82	93	80	91	80	90	79	92	80	91	95	97	94	94	92	91
IHE11	20	183	65	19.4094	3.24	49.91	24.7	24.5	25.3	63	68	56	0.3	0.3	0.3	0.3	0.55	0.3	0.3	0.56	0.54	96	79	94	80	95	80	94	79	95	80		95	85	91	85	91	82	91	84	92	82	91	96	93	93	92	92	93
IHE12	23	183	90	26.8745	4.56	50.68	25.6	25.7	24.2	68	71	66	0.3	0.53	0.3	0.3	0.65	0.3	0.3	0.3	0.3	95	69	97	76	97	68	97	73	96	75	97	96	70	93	74	92	73	93	75	93	77	93	96	93	93	94	92	93
IHE14	24	190	84	23.2687	3.6	42.85	24.2	22.8	25.3	58	59	63	0.3	2.17	1.29	0.56	5.41	4.28	0.3	1.65	0.94	96	84	99	77	98	82	98	78	98	79	98	99	55	94	74	95	75	93	75	95	73	91	96	96	95	96	96	95
IHE15	22	178	80	25.2493	4.02	50.3	25.9	24.5	24.3	68	61	65	0.62	1.38	0.97	0.65	1.74	1.06	0.79	0.99	0.58	94	82	97	86	97	84	97	82	98	81	97	96	81	92	79	93	81	92	78	92	81	92	98	95	93	93	92	93
IHE16	25	183	75	22.3954	5.33	71.04	23.3	24.5	23.4	52	58	55	0.3	1.38	0.58	0.3	1.27	0.62	0.3	1.05	0.76	96	85	98	88	97	89	97	89	97	90	98	97	87	94	80	94	86	93	88	93	87	93	97	96	96	94	93	93
[truncated: 248 more columns]
